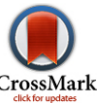

## Correction

# Correction: Individual Differences in Ethanol Locomotor Sensitization Are Associated with Dopamine D1 Receptor Intra-Cellular Signaling of DARPP-32 in the Nucleus Accumbens

The *PLOS ONE* Staff

There is an error in the first sentence of the Introduction. The publisher apologizes for the error. The correct sentence is: Although alcoholism is a worldwide problem resulting in millions of deaths, only a small percentage of alcohol users become addicted [1].

## Reference

1. Abrahao KP, Oliveira Goeldner F, Souza-Formigoni MLO (2014) Individual Differences in Ethanol Locomotor Sensitization Are Associated with Dopamine D1 Receptor Intra-Cellular Signaling of DARPP-32 in the Nucleus Accumbens. PLoS ONE 9(6): e98296. doi:10.1371/journal.pone.0098296

**Citation:** The *PLOS ONE* Staff (2014) Correction: Individual Differences in Ethanol Locomotor Sensitization Are Associated with Dopamine D1 Receptor Intra-Cellular Signaling of DARPP-32 in the Nucleus Accumbens. PLoS ONE 9(7): e104151. doi:10.1371/journal.pone.0104151

**Published:** July 25, 2014

**Copyright:** © 2014 The *PLOS ONE* Staff. This is an open-access article distributed under the terms of the Creative Commons Attribution License, which permits unrestricted use, distribution, and reproduction in any medium, provided the original author and source are credited.
